# Supplementary material for: Cystathionine-β-synthase is essential for AKT-induced senescence and suppresses the development of gastric cancers with PI3K/AKT activation
Source: PubMed Central journal article supplement (PMC9236611; doi:10.7554/elife.71929), 2022-06-27
Supplement: elife-71929-fig1-data1.pdf [file elife-71929-fig1-data1.pdf]

# Figure 1-source data 1

Unedited immunoblots of Figure 1B.

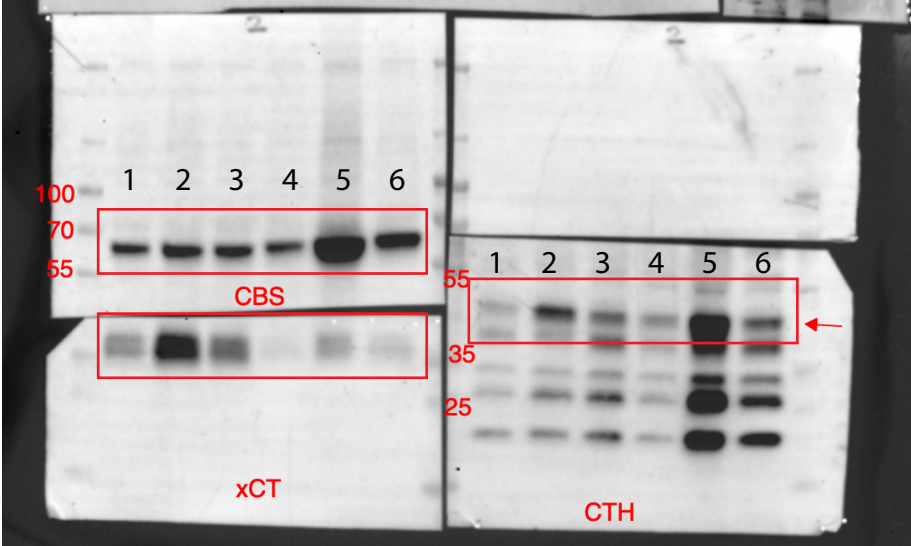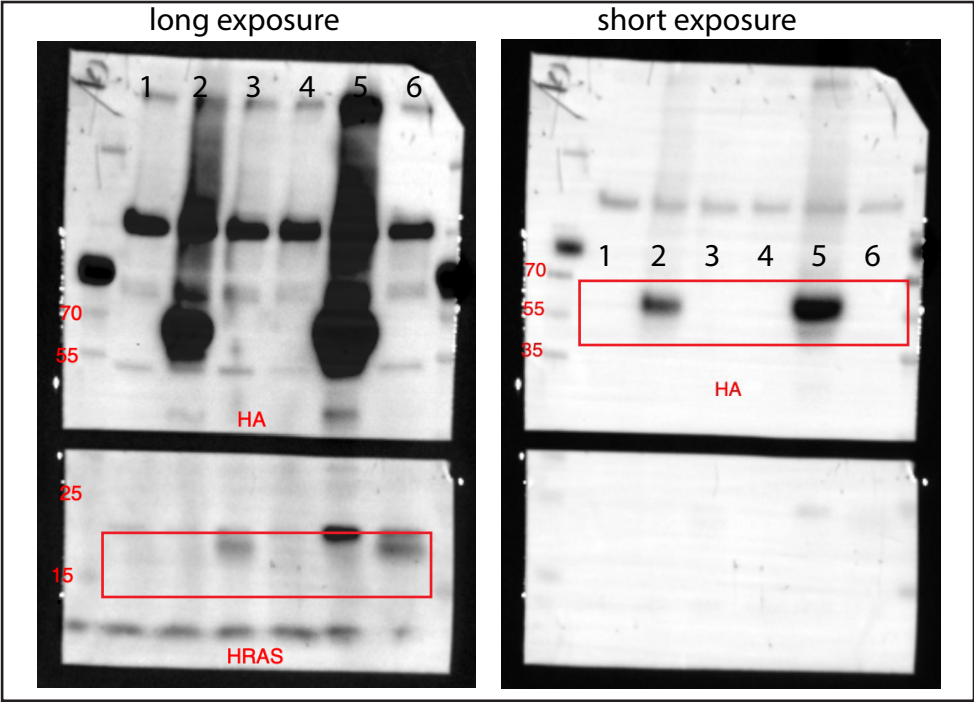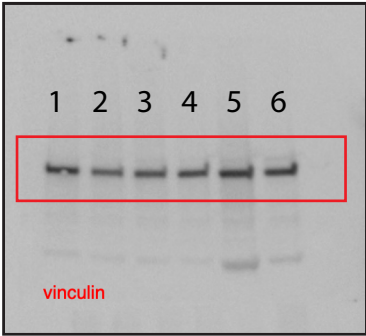

1. pBabe\_FM
2. myrAKT1\_FM
3. HRAS<sup>G12V</sup>\_FM
4. pBabe\_Cys-free
5. myrAKT1\_Cys-free
6. HRAS<sup>G12V</sup>\_Cys-free
