# Supplementary material for: Cystathionine-β-synthase is essential for AKT-induced senescence and suppresses the development of gastric cancers with PI3K/AKT activation
Source: PubMed Central journal article supplement (PMC9236611; doi:10.7554/elife.71929), 2022-06-27
Supplement: elife-71929-fig1-figsupp1-data1.pdf [file elife-71929-fig1-figsupp1-data1.pdf]

# Figure 1-figure supplement 1-source data 1

Unedited immunoblots of Figure 1-figure supplement 1B

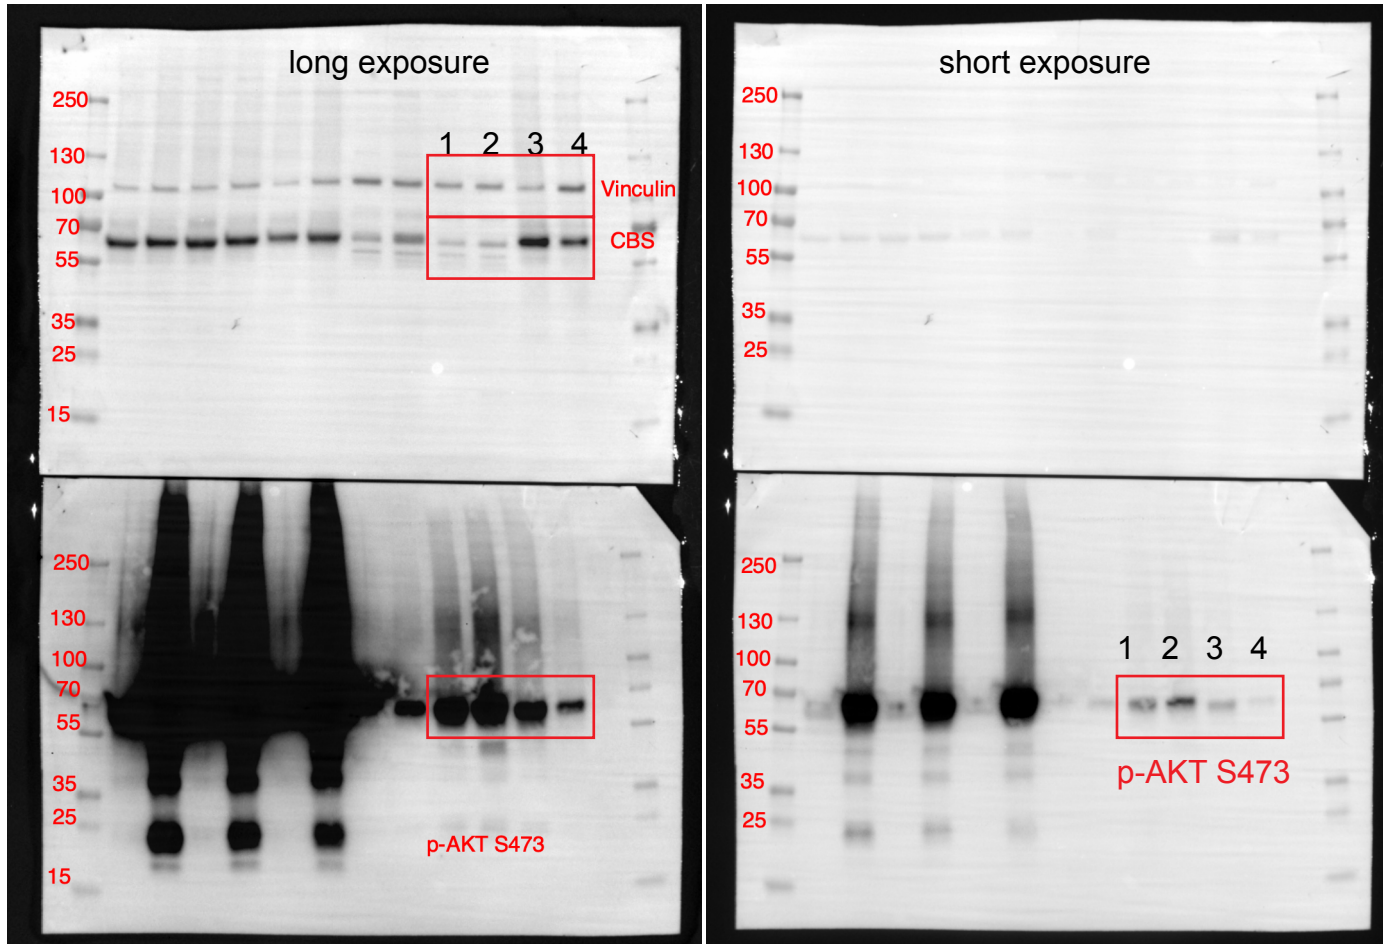

1. HMEC pBabe
2. HMEC AKT<sup>E17K</sup>
3. BJ-T AKT<sup>E17K</sup>
4. BJ-pBabe
