# Supplementary material for: Cystathionine-β-synthase is essential for AKT-induced senescence and suppresses the development of gastric cancers with PI3K/AKT activation
Source: PubMed Central journal article supplement (PMC9236611; doi:10.7554/elife.71929), 2022-06-27
Supplement: elife-71929-fig2-data2.pdf [file elife-71929-fig2-data2.pdf]

## Figure 2-source data 2

Unedited immunoblots of Figure 2C

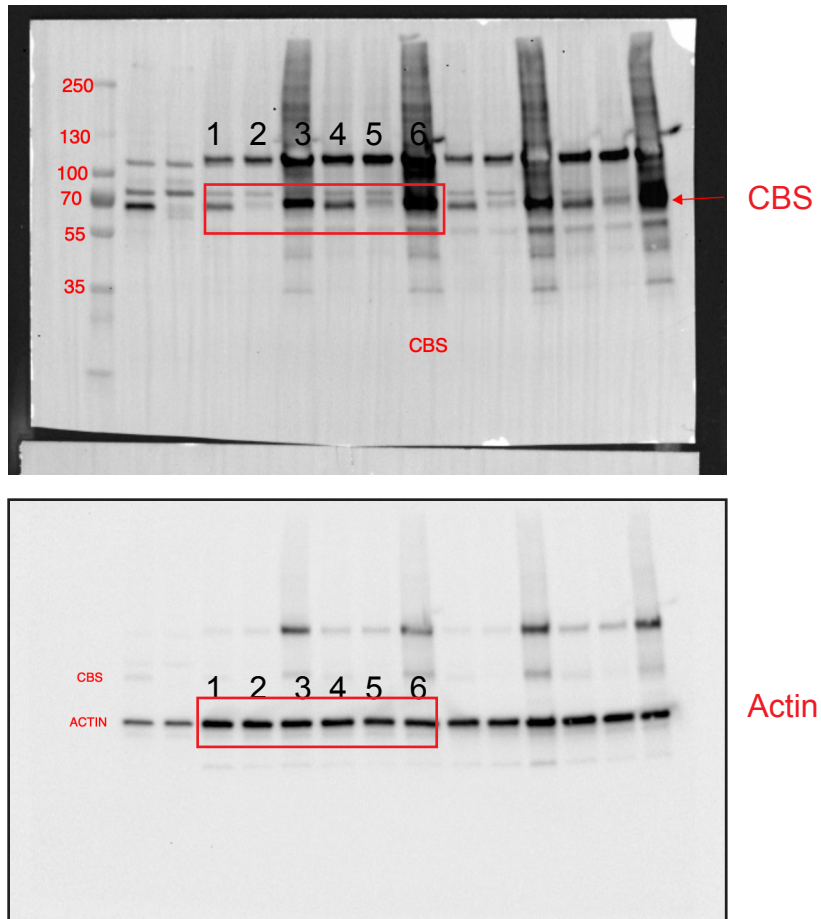

1. pBabe DOX- 4-OHT-
2. pBabe DOX+4-OHT-
3. pBabe DOX+ 4-OHT+
4. myrAKT1 DOX- 4-OHT-
5. myrAKT1 DOX+ 4-OHT-
6. myrAKT1 DOX+ 4-OHT+
