# Supplementary material for: Cystathionine-β-synthase is essential for AKT-induced senescence and suppresses the development of gastric cancers with PI3K/AKT activation
Source: PubMed Central journal article supplement (PMC9236611; doi:10.7554/elife.71929), 2022-06-27

# Figure 2-figure supplement 1-source data 1

Unedited immunoblots of Figure 2-figure supplement 1A and 1D

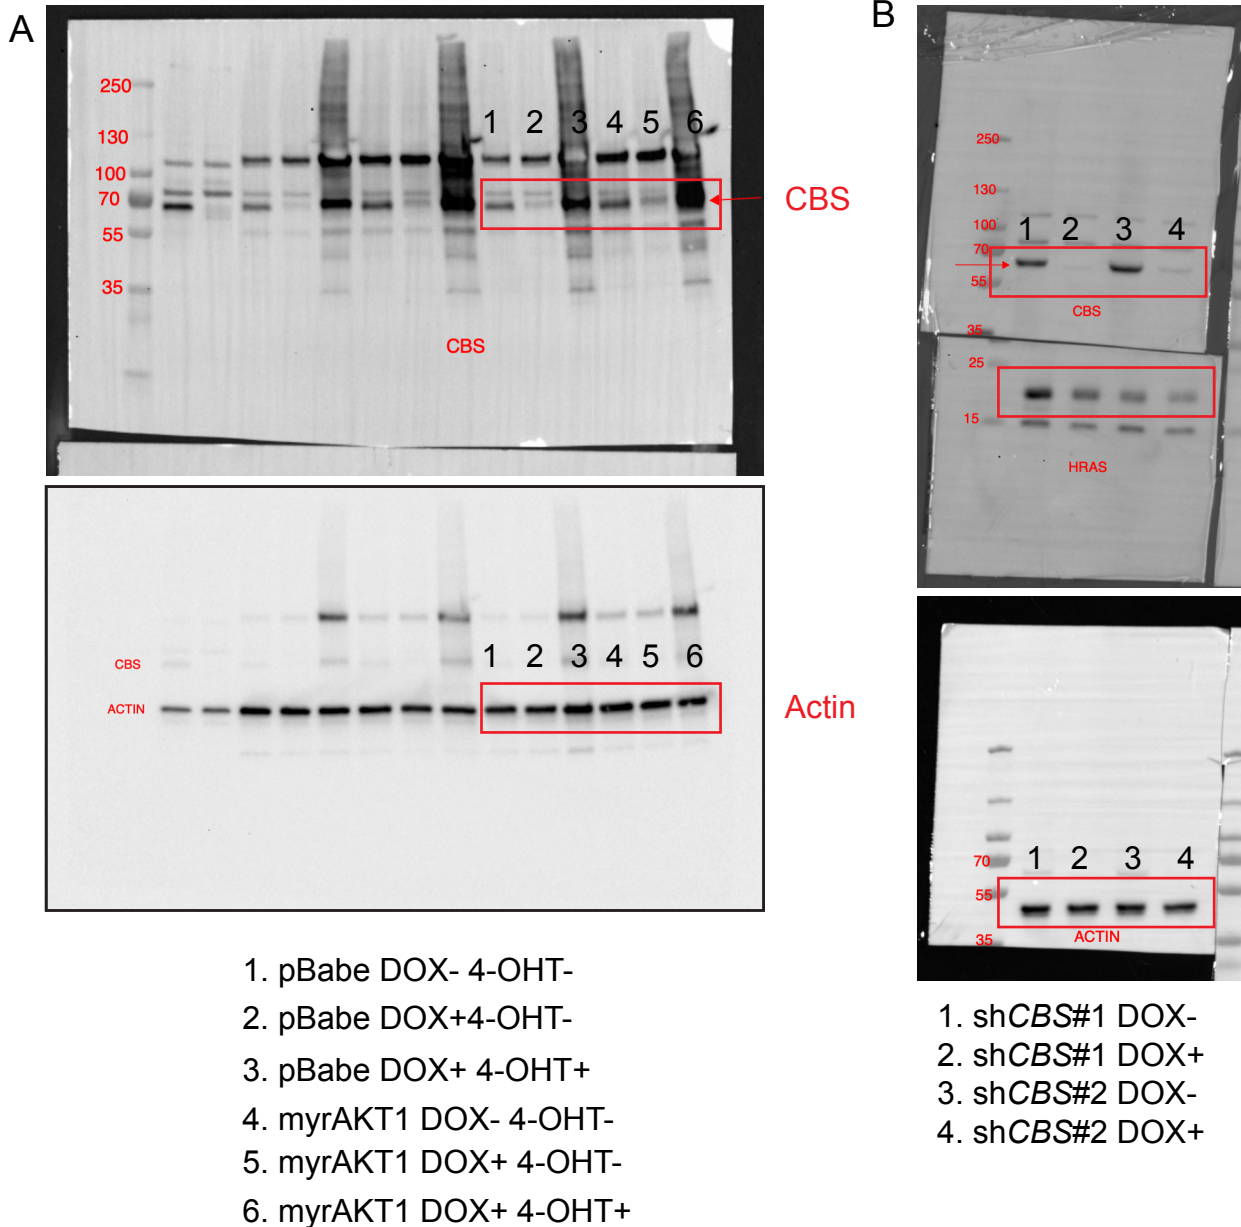

Supplement: elife-71929-fig2-figsupp1-data1.pdf [file elife-71929-fig2-figsupp1-data1.pdf]
