# Supplementary material for: Cystathionine-β-synthase is essential for AKT-induced senescence and suppresses the development of gastric cancers with PI3K/AKT activation
Source: PubMed Central journal article supplement (PMC9236611; doi:10.7554/elife.71929), 2022-06-27
Supplement: elife-71929-fig4-data3.pdf [file elife-71929-fig4-data3.pdf]

## Figure 4-source data 3

Unedited immunoblots of Figure 4F.

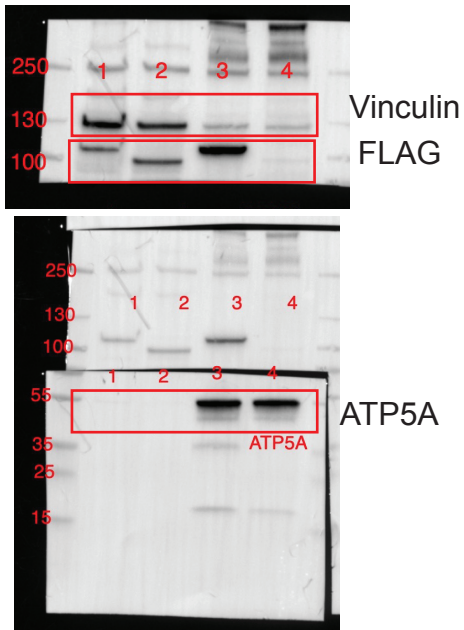

1. cytoplasm\_WT-FLAG
2. Cytoplasm\_Δ468-551
3. Mitochondria\_WT-FLAG
4. Mitochondria\_Δ468-551
