# Supplementary material for: Cystathionine-β-synthase is essential for AKT-induced senescence and suppresses the development of gastric cancers with PI3K/AKT activation
Source: PubMed Central journal article supplement (PMC9236611; doi:10.7554/elife.71929), 2022-06-27
Supplement: elife-71929-fig6-data1.pdf [file elife-71929-fig6-data1.pdf]

# Figure 6-source data 1

Unedited immunoblots of Figure 6F

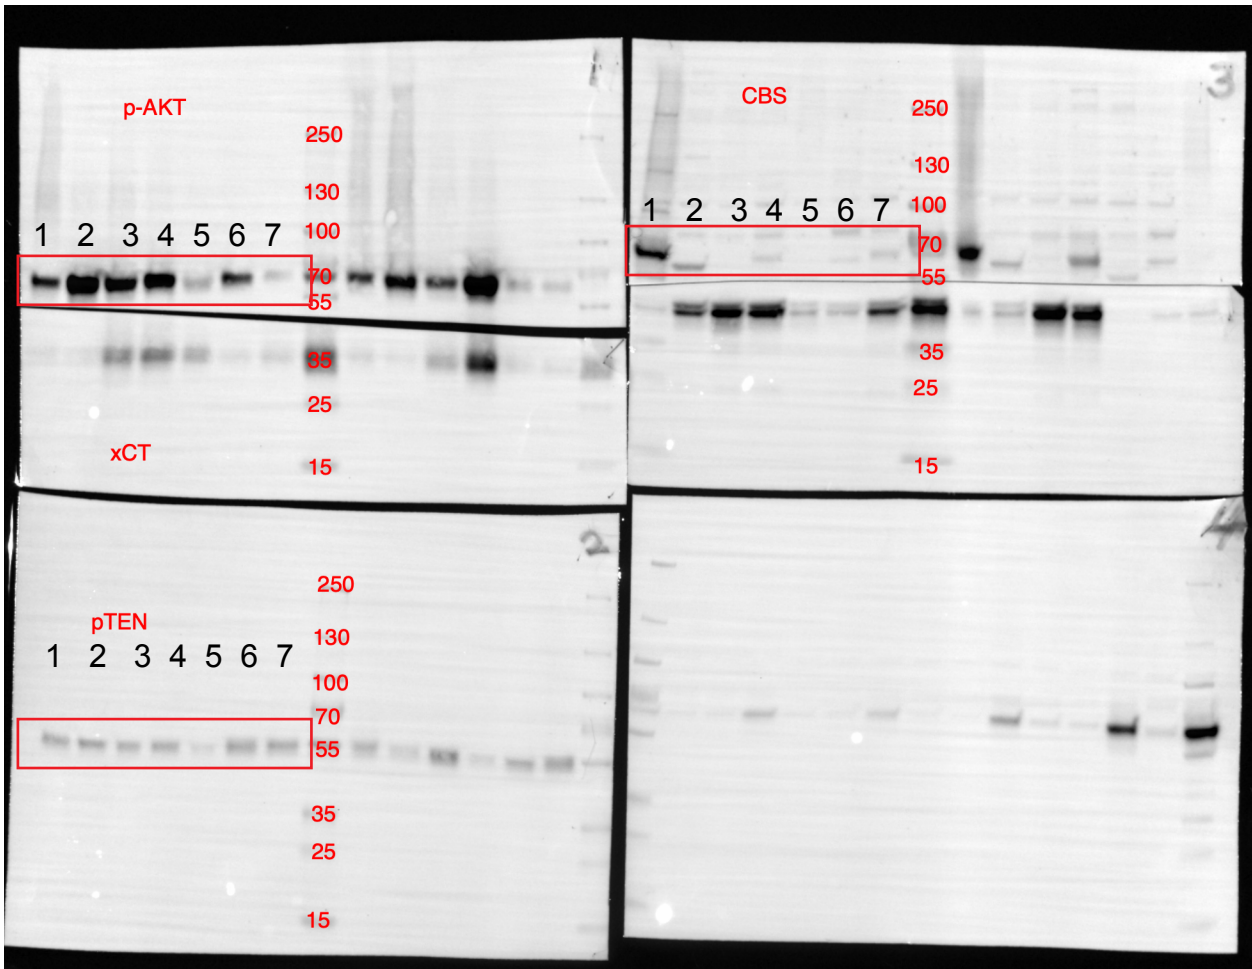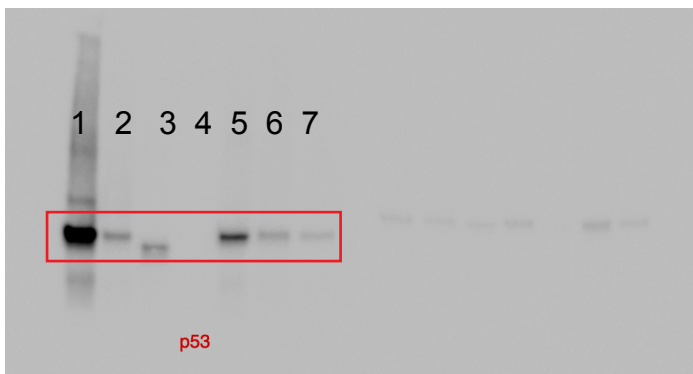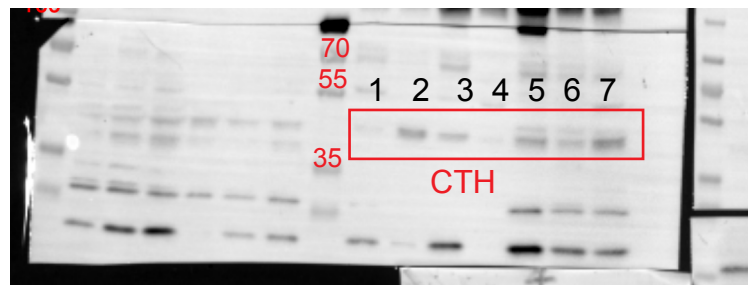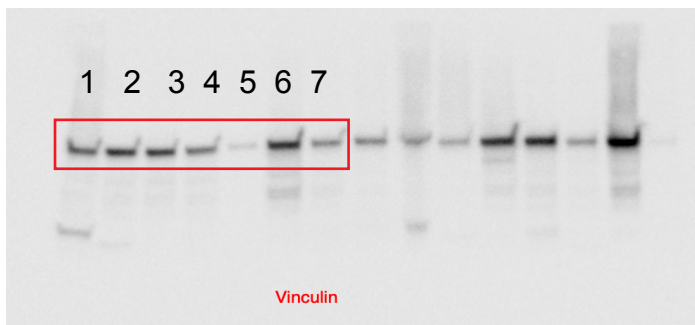

1. GES-1
2. AGS
3. Hs746T
4. KATOIII
5. NCI-N87
6. NCI-SNU1
7. NCI-SNU5
