# Supplementary material for: Cystathionine-β-synthase is essential for AKT-induced senescence and suppresses the development of gastric cancers with PI3K/AKT activation
Source: PubMed Central journal article supplement (PMC9236611; doi:10.7554/elife.71929), 2022-06-27

## Figure 7-source data 1

Unedited immunoblots of Figure 7A

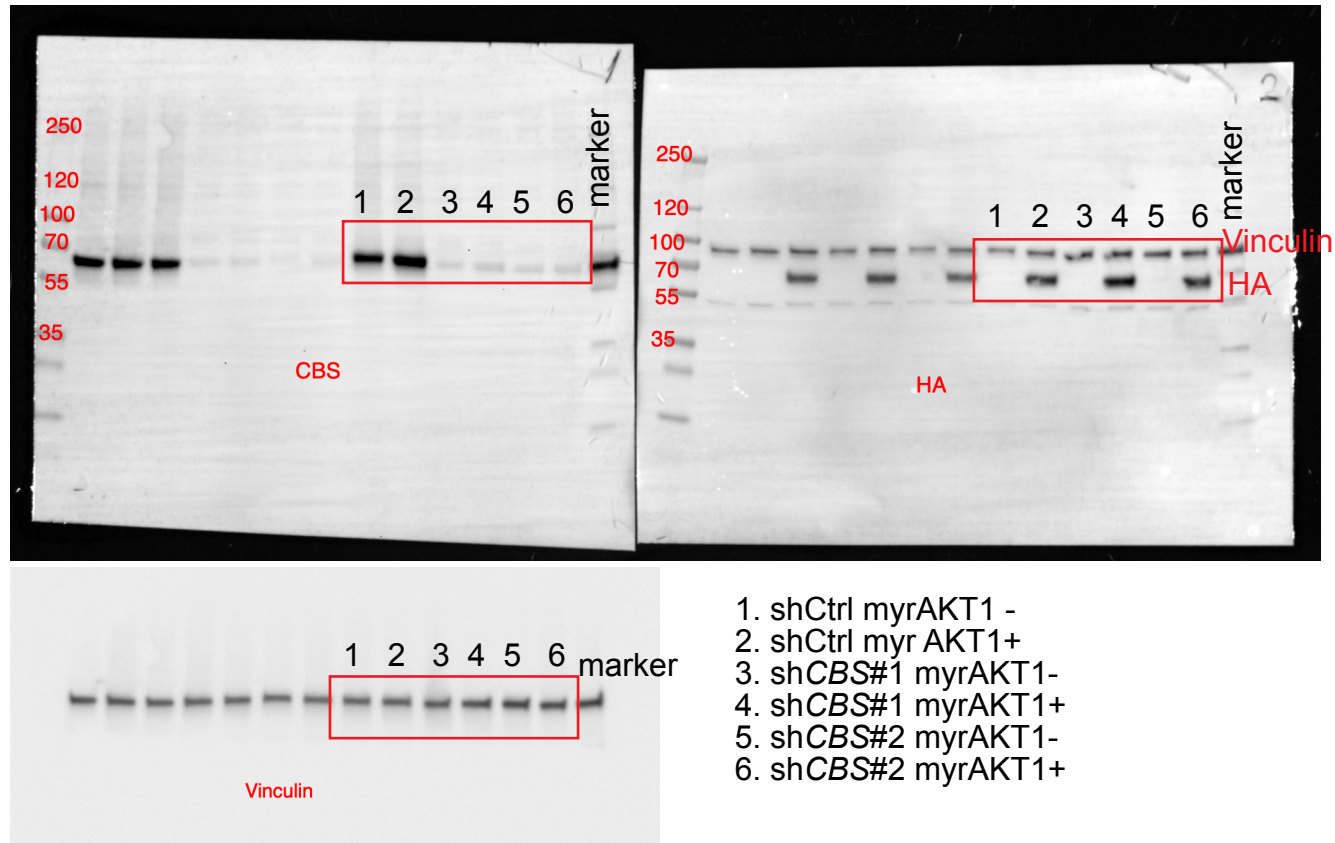

Supplement: elife-71929-fig7-data1.pdf [file elife-71929-fig7-data1.pdf]
