# Supplementary material for: Cystathionine-β-synthase is essential for AKT-induced senescence and suppresses the development of gastric cancers with PI3K/AKT activation
Source: PubMed Central journal article supplement (PMC9236611; doi:10.7554/elife.71929), 2022-06-27

## Figure 7-source data 2

Unedited immunoblots of Figure 7C

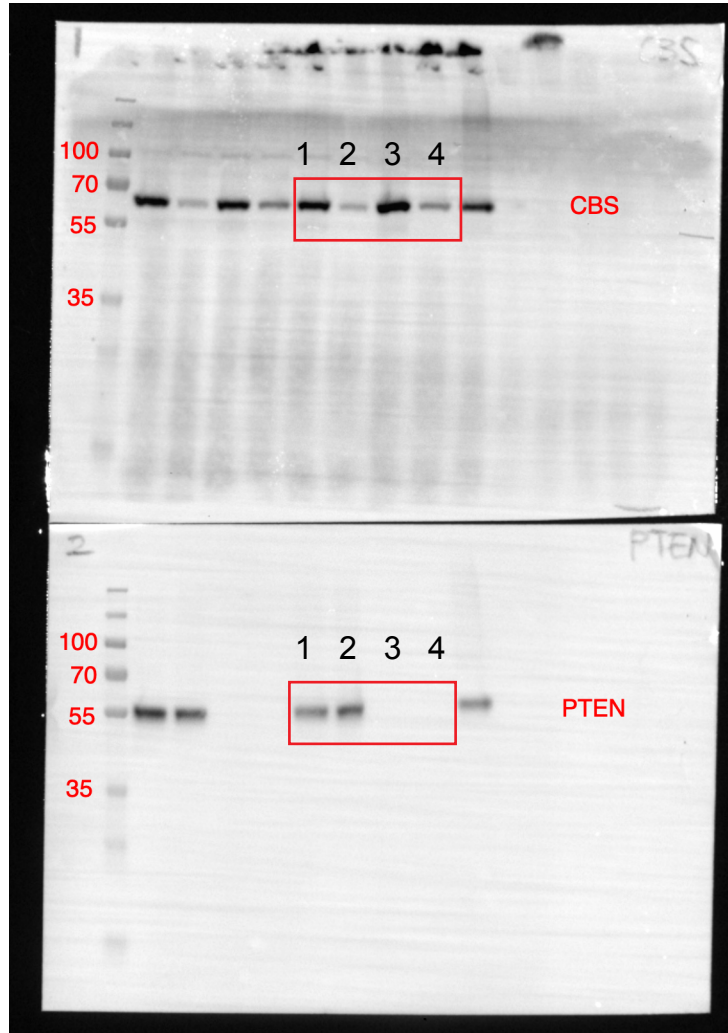

1. Cas9\_shCBS-
2. Cas9\_shCBS+
3. sgPTEN\_shCBS-
4. sgPTEN\_shCBS+

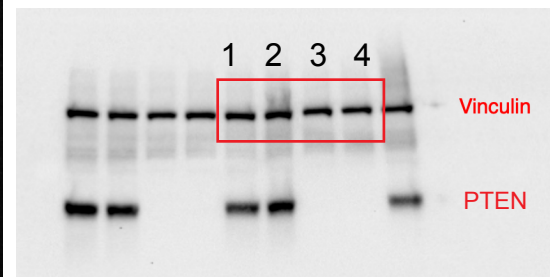

Supplement: elife-71929-fig7-data2.pdf [file elife-71929-fig7-data2.pdf]
