# Supplementary material for: Cystathionine-β-synthase is essential for AKT-induced senescence and suppresses the development of gastric cancers with PI3K/AKT activation
Source: PubMed Central journal article supplement (PMC9236611; doi:10.7554/elife.71929), 2022-06-27
Supplement: elife-71929-fig7-data3.pdf [file elife-71929-fig7-data3.pdf]

## Figure 7-source data 3

Unedited immunoblots of Figure 7E

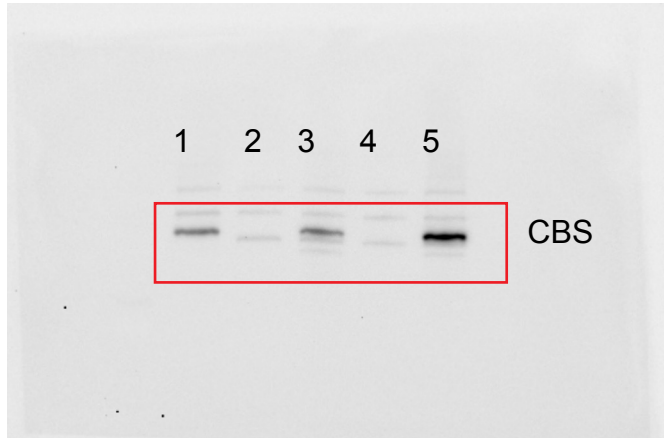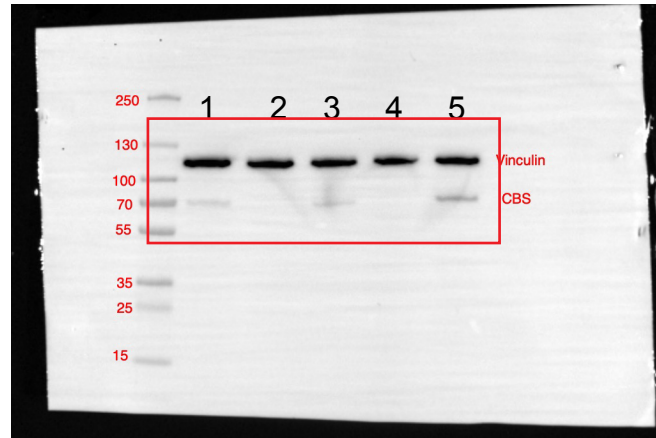

- 1 CBSWT DOX+
- 2 CBS WT DOX-
- 3 CBSI278T DOX+
- 4 CBS I278T DOX-
- 5 GES1
