# Supplementary material for: Cystathionine-β-synthase is essential for AKT-induced senescence and suppresses the development of gastric cancers with PI3K/AKT activation
Source: eLife journal article supplement (doi:10.7554/elife.71929), 2022-06-07

# Figure 2-source data 3

Unedited immunoblots of Figure 2F

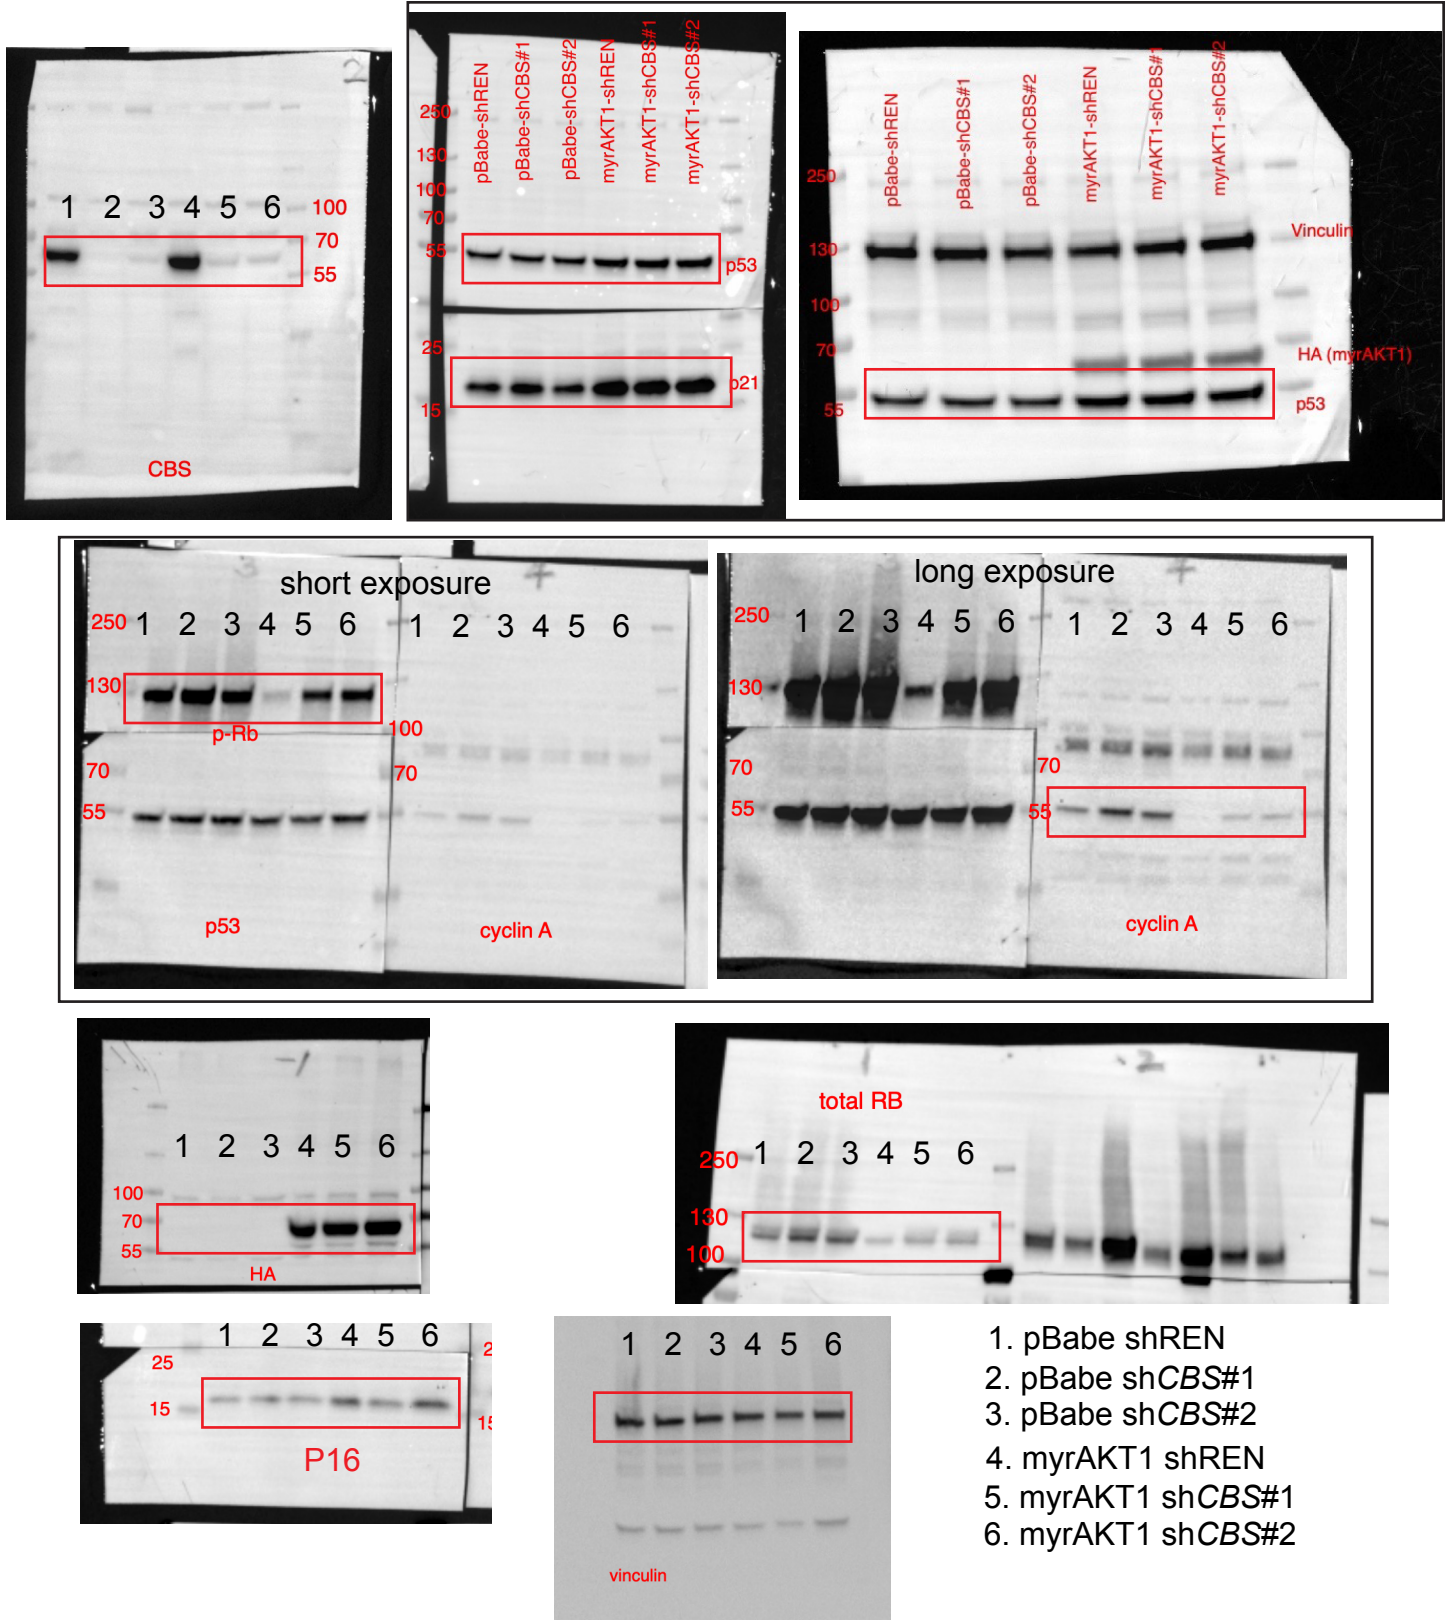

Supplement: fig2-data3 [file elife-71929-fig2-data3-v1.pdf]
