# Supplementary material for: Cystathionine-β-synthase is essential for AKT-induced senescence and suppresses the development of gastric cancers with PI3K/AKT activation
Source: eLife journal article supplement (doi:10.7554/elife.71929), 2022-06-07

## Figure 4-source data 2

Unedited immunoblots of Figure 4D.

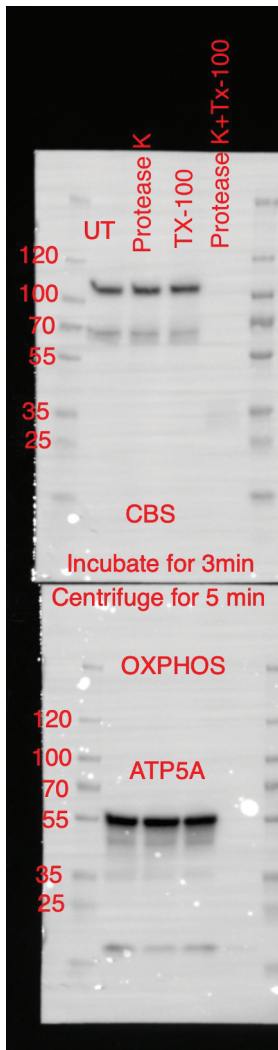

Supplement: fig4-data2 [file elife-71929-fig4-data2-v1.pdf]
